# Supplementary material for: Subclinical Elevation of Plasma C-Reactive Protein and Illusions/Hallucinations in Subjects with Parkinson’s Disease: Case–control Study
Source: PubMed Central journal article supplement (PMC3908859; doi:10.1371/journal.pone.0085886), 2014-01-31

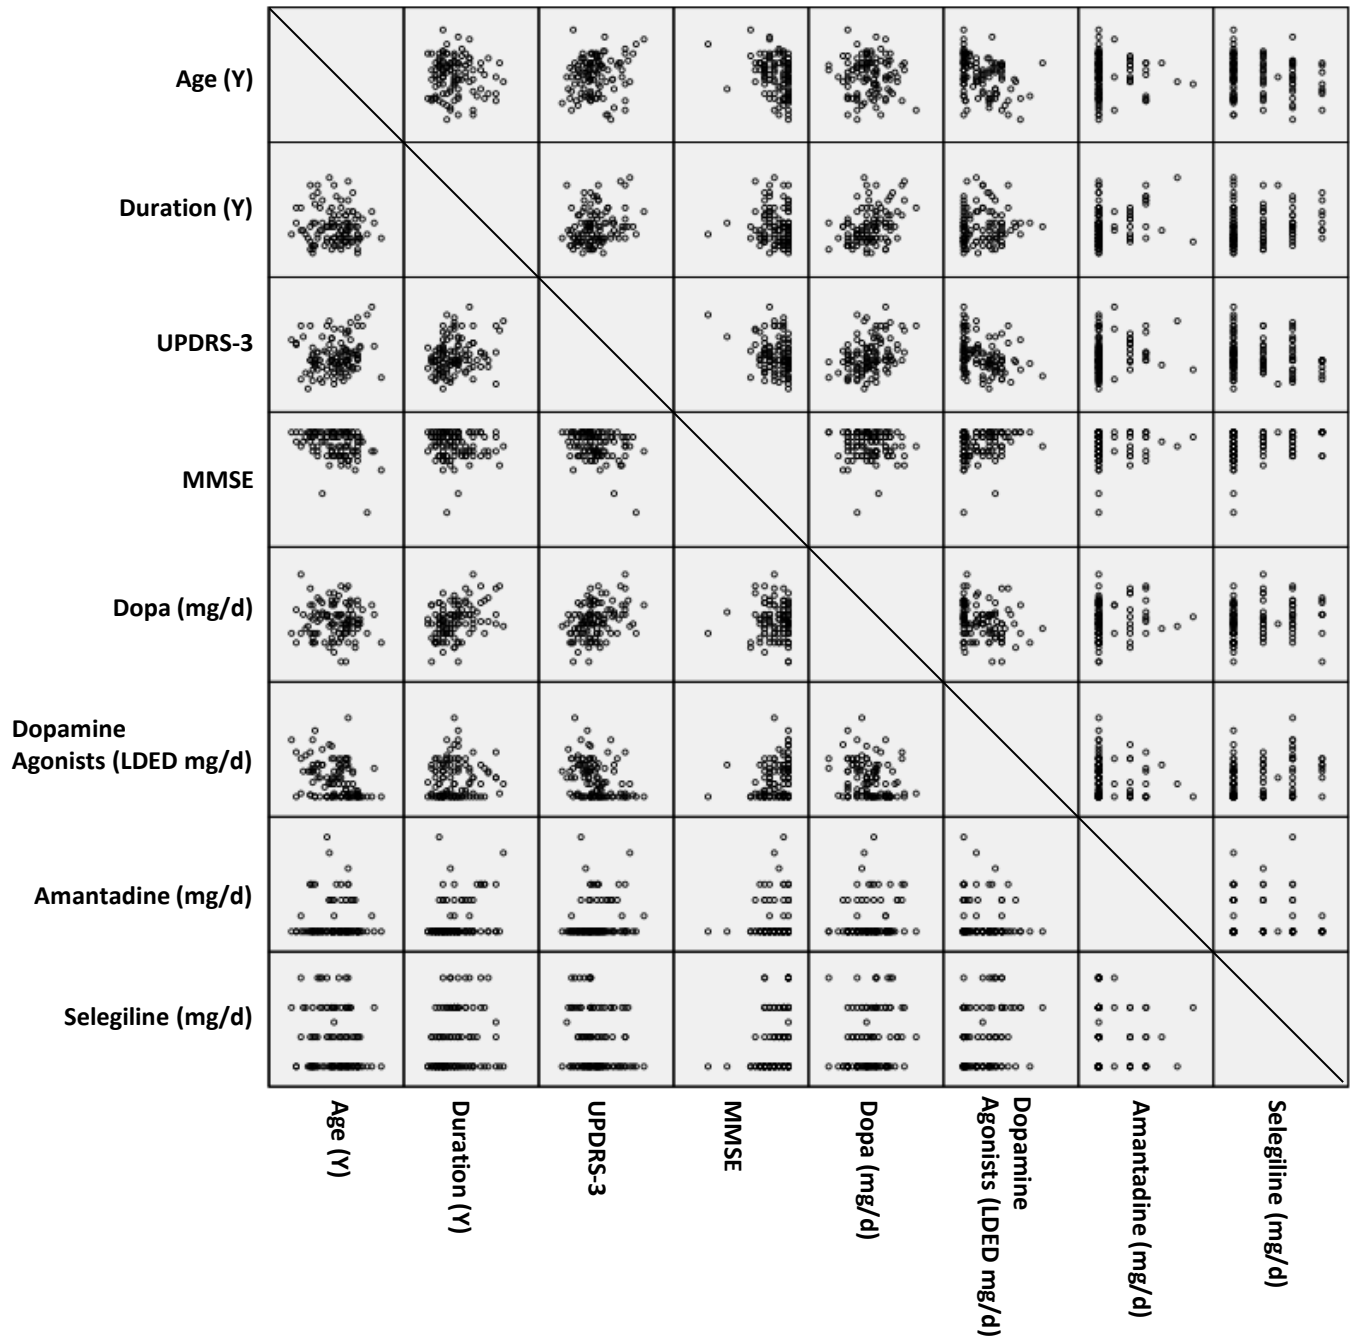

Supplement: pone.0085886.s002.pdf [file pone.0085886.s002.pdf]
