# Supplementary material for: Subclinical Elevation of Plasma C-Reactive Protein and Illusions/Hallucinations in Subjects with Parkinson’s Disease: Case–control Study
Source: PubMed Central journal article supplement (PMC3908859; doi:10.1371/journal.pone.0085886), 2014-01-31
Supplement: pone.0085886.s004.pdf [file pone.0085886.s004.pdf]

Table S1. Relationship between PPQ-B (hallucinations/illusions) and PPQ-C (delusions)

|                                           |   | PPQ-C scores (delusions) |   |   |   | Total |
|-------------------------------------------|---|--------------------------|---|---|---|-------|
|                                           |   | 0                        | 3 | 4 | 5 |       |
| PPQ-B scores<br>(hallucinations/illusion) | 0 | 83                       | 0 | 0 | 0 | 83    |
|                                           | 1 | 9                        | 0 | 0 | 0 | 9     |
|                                           | 2 | 8                        | 0 | 3 | 1 | 12    |
|                                           | 3 | 4                        | 0 | 0 | 0 | 4     |
|                                           | 4 | 0                        | 0 | 1 | 0 | 1     |
|                                           | 6 | 1                        | 1 | 0 | 0 | 2     |
| Total                                     |   | 105                      | 1 | 4 | 1 |       |
