# Supplementary material for: Subclinical Elevation of Plasma C-Reactive Protein and Illusions/Hallucinations in Subjects with Parkinson’s Disease: Case–control Study
Source: PubMed Central journal article supplement (PMC3908859; doi:10.1371/journal.pone.0085886), 2014-01-31
Supplement: pone.0085886.s005.pdf [file pone.0085886.s005.pdf]

Table S2. Psychosis in 28 cases

|                         | n ( % )    |
|-------------------------|------------|
| illusions               | 13 ( 46% ) |
| visual hallucinations   | 19 ( 68% ) |
| auditory hallucinations | 14 ( 50% ) |
| tactile hallucinations  | 2 ( 7% )   |
| delusions               | 6 ( 21% )  |
