# Supplementary material for: Subclinical Elevation of Plasma C-Reactive Protein and Illusions/Hallucinations in Subjects with Parkinson’s Disease: Case–control Study
Source: PLoS One. 2014 Jan 31;9(1):e85886. doi: 10.1371/journal.pone.0085886 (PMC3908859; doi:10.1371/journal.pone.0085886)
Supplement: Table S3 — Spearman’s correlation coefficient between scale predictable variables. (PDF) [file pone.0085886.s006.pdf]

Table S3. Spearman's correlation coefficient between scale predictable variables

|                      | Age (Y) | Duration of PD (Y) | UPDRS-3 (point) | MMSE (point) | Dopa (mg/d) | Agonist (LDED, mg/d) | Aamantadine (mg/d) | Selegiline (mg/d) |
|----------------------|---------|--------------------|-----------------|--------------|-------------|----------------------|--------------------|-------------------|
| Age (Y)              | 1.00    | -0.04              | 0.17            | -0.31        | 0.00        | -0.37                | -0.04              | -0.14             |
| Duration of PD (Y)   |         | 1.00               | 0.23            | -0.11        | 0.37        | 0.10                 | 0.28               | 0.24              |
| UPDRS-3 (point)      |         |                    | 1.00            | -0.26        | 0.34        | -0.36                | 0.22               | -0.17             |
| MMSE (point)         |         |                    |                 | 1.00         | -0.12       | 0.34                 | 0.06               | 0.24              |
| Dopa (mg/d)          |         |                    |                 |              | 1.00        | -0.27                | 0.15               | 0.25              |
| Agonist (LDED, mg/d) |         |                    |                 |              |             | 1.00                 | -0.08              | 0.29              |
| Aamantadine (mg/d)   |         |                    |                 |              |             |                      | 1.00               | 0.05              |
| Selegiline (mg/d)    |         |                    |                 |              |             |                      |                    | 1.00              |
